# Supplementary material for: A transversal approach to predict gene product networks from ontology-based similarity
Source: Springer Nature journal article supplement (doi:10.1186/1471-2105-8-235), 2007-07-02
Supplement: Additional file 1 [file 1471-2105-8-235-s1.pdf]

# A transversal approach to predict gene product networks from ontology-based similarity

**Julie Chabalier, Jean Mosser and Anita Burgun**

## Supplementary information: Main results – GO profiles

| Network  | Gene product                                                                                        | Gene Ontology profile<br>(occurrence number of shared terms)                                                                                                                                                                                                                                                                    |
|----------|-----------------------------------------------------------------------------------------------------|---------------------------------------------------------------------------------------------------------------------------------------------------------------------------------------------------------------------------------------------------------------------------------------------------------------------------------|
| <b>1</b> | ALG8 - RPL41 - RPL7A -RPL35A - RPL39 - RPS3 -RPS7 - MAN2A1 - RPL13A - EIF4A2 - EIF3S8 - EIF3S2      | cellular biosynthesis(66)<br>cellular macromolecule metabolism(66)<br>macromolecule biosynthesis(66)<br>protein metabolism(66)<br>regulation of biosynthesis(3)                                                                                                                                                                 |
| <b>2</b> | GLS - GATM - ASS -CPS1 – GLUL - ODC1 - SEPHS2 - SMS                                                 | amine metabolism(10)<br>amino acid and derivative metabolism(10)<br>organic acid metabolism(8)<br>cellular biosynthesis(6)<br>nitrogen compound biosynthesis(1)<br>sulfur metabolism(1)<br>arginine metabolism(1)                                                                                                               |
| <b>3</b> | APOM - APOC3 - APOA1 -APOB<br>UGT2B17 - AKR1C3 - ACAS2<br>HMGS1 - MBTPS1 - UBE2D1<br>MEP1A - RNF128 | lipid metabolism(18)<br>cellular lipid metabolism(17)<br>cellular macromolecule metabolism(8)<br>protein metabolism(8)<br>biopolymer catabolism(6)<br>cellular catabolism(6)<br>macromolecule catabolism(6)<br>alcohol metabolism(5)                                                                                            |
| <b>4</b> | HMGA2 -H3F3B - H2AFY - NAP1L4<br>NAP1L1 - MCM3 - TRIM28 - PIAS4<br>G22P1 - HMGB1                    | nucleobase, nucleoside, nucleotide and nucleic acid metabolism(14)<br>DNA metabolism(12)<br>organelle organization and biogenesis(10)<br>cellular macromolecule metabolism(7)<br>protein metabolism(7)<br>regulation of nucleobase, nucleoside, nucleotide and nucleic acid metabolism(5)<br>response to DNA damage stimulus(1) |
| <b>5</b> | CS - GAPD - LDHB -ACO1                                                                              | generation of precursor metabolites and energy(4)<br>carbohydrate metabolism(4)<br>cellular catabolism(4)<br>cellular macromolecule metabolism(4)<br>cofactor metabolism(1)<br>alcohol metabolism (1)<br>macromolecule catabolism(1)                                                                                            |
| <b>6</b> | ATP7B - SLC26A3 - SLC11A2 - TF                                                                      | ion transport(6)                                                                                                                                                                                                                                                                                                                |
| <b>7</b> | VAPB - HSPA9B - TRIP12 - NKTR<br>TRAP1                                                              | cellular macromolecule metabolism(10)<br>protein metabolism (10)                                                                                                                                                                                                                                                                |
| <b>8</b> | HSPD1 - KPNB1 - CALR                                                                                | protein transport(3)<br>establishment of protein localization(3)<br>intracellular transport(3)<br>cellular macromolecule metabolism(1)<br>protein metabolism(1)                                                                                                                                                                 |

|           |                              |                                                                                                                                                                                                                        |
|-----------|------------------------------|------------------------------------------------------------------------------------------------------------------------------------------------------------------------------------------------------------------------|
| <b>9</b>  | RNASE4 -IVNS1ABP - SF3B2 RNA | metabolism (3)<br>nucleobase, nucleoside, nucleotide and<br>nucleic acid metabolism (3)                                                                                                                                |
| <b>10</b> | KRT8 -TUBA1                  | organelle organization and biogenesis                                                                                                                                                                                  |
| <b>11</b> | NME2 - NME1                  | nucleobase, nucleoside, nucleotide and<br>nucleic acid metabolism<br>cellular biosynthesis<br>negative regulation of cellular physiological<br>process<br>regulation of cell proliferation<br>regulation of cell cycle |
| <b>12</b> | ADH4 - GPD1                  | alcohol metabolism                                                                                                                                                                                                     |
| <b>13</b> | FN1 - SERPINA1               | defense response<br>response to pest, pathogen or parasite<br>response to external biotic stimulus                                                                                                                     |
| <b>14</b> | ZW10 - MMS19L                | M phase<br>mitotic cell cycle<br>sister chromatid segregation                                                                                                                                                          |
| <b>15</b> | SLC2A5 - SLC2A3              | carbohydrate transport                                                                                                                                                                                                 |
| <b>16</b> | CDC2 - STK6                  | phosphorus metabolism<br>cellular macromolecule metabolism<br>protein metabolism<br>M phase<br>mitotic cell cycle                                                                                                      |
| <b>17</b> | AKR1C1 - NDRG1               | response to abiotic stimulus                                                                                                                                                                                           |
| <b>18</b> | VTN - AFP                    | defense response                                                                                                                                                                                                       |
